# Supplementary material for: Gray Matter Alterations in Early and Late Relapsing-Remitting Multiple Sclerosis Evaluated with Synthetic Quantitative Magnetic Resonance Imaging
Source: PubMed Central journal article supplement (PMC6544650; doi:10.1038/s41598-019-44615-3), 2019-05-31
Supplement: 41598_2019_44615_MOESM1_ESM.pdf [file 41598_2019_44615_MOESM1_ESM.pdf]

# Gray Matter Alterations in Early and Late Relapsing-Remitting Multiple Sclerosis Evaluated with Synthetic Quantitative Magnetic Resonance Imaging

Christina Andica<sup>1</sup>, Akifumi Hagiwara<sup>1,2\*</sup>, Koji Kamagata<sup>1</sup>, Kazumasa Yokoyama<sup>3</sup>, Keigo Shimoji<sup>1,4</sup>, Asami Saito<sup>1</sup>, Yuki Takenaka<sup>1,5</sup>, Misaki Nakazawa<sup>1</sup>, Masaaki Hori<sup>1</sup>, Julien Cohen-Adad<sup>6,7</sup>, Mariko Yoshida Takemura<sup>1</sup>, Nobutaka Hattori<sup>3</sup>, Shigeki Aoki<sup>3</sup>

<sup>1</sup>Department of Radiology, Juntendo University Graduate School of Medicine, Tokyo, Japan

<sup>2</sup>Department of Radiology, The University of Tokyo Graduate School of Medicine, Tokyo, Japan

<sup>3</sup>Department of Neurology, Juntendo University School of Medicine, Tokyo, Japan

<sup>4</sup>Department of Radiology, Tokyo Metropolitan Geriatric Hospital and Institute of Gerontology, Tokyo, Japan

<sup>5</sup>Department of Radiological Sciences, Graduate School of Human Health Sciences, Tokyo Metropolitan University, Tokyo, Japan

<sup>6</sup>Institute of Biomedical Engineering, Polytechnique Montreal, Montreal, Quebec, Canada

<sup>7</sup>Functional Neuroimaging Unit, CRIUGM, Université de Montréal, Montreal, Quebec, Canada

**Supplementary Table 1.** GBSS analysis of PD in late RRMS patients compared to healthy controls.

| Significant areas             |                                                                                                          | Number of significant voxels | Peak $p$ -FWE | Peak MNI Coordinates |    |    |
|-------------------------------|----------------------------------------------------------------------------------------------------------|------------------------------|---------------|----------------------|----|----|
|                               |                                                                                                          |                              |               | X                    | Y  | Z  |
| Healthy control vs. Late RRMS |                                                                                                          |                              | 0.05          | 37                   | 47 | 31 |
| Frontal                       | Rt-Latero Orbito Frontal                                                                                 | 32                           |               |                      |    |    |
| Temporal                      | Rt-Entorhinal; Rt-Fusiform; Rt-Temporal pole                                                             | 72                           |               |                      |    |    |
| Occipital                     | Lt-Rt-Lingual; Lt-Rt-Pericalcarine                                                                       | 38                           |               |                      |    |    |
| Limbic and Para-limbic        | Lt-Posterior Cingulate; Rt-Isthmus Cingulate; Rt-Hippocampus; Rt-Amygdala; Rt-Parahippocampal; Rt-Insula | 872                          |               |                      |    |    |
| Deep GM                       | Rt-Thalamus, Rt-Putamen                                                                                  | 144                          |               |                      |    |    |

Lt, left; Rt, right; GM, gray matter; GBSS, gray-matter–based spatial statistics;  $p$ -FWE, family-wise error-corrected  $p$ -value; PD, proton density; RRMS, relapsing-remitting multiple sclerosis. Note: Only regions with significantly decreased PD are included.

**Supplementary Table 2.** GBSS analysis of R2 late RRMS patients compared to healthy controls and early RRMS patients.

| Significant areas             |                                                                                                                                                                  | Number of significant voxels | Peak <i>p</i> -FWE | Peak MNI Coordinates |    |    |
|-------------------------------|------------------------------------------------------------------------------------------------------------------------------------------------------------------|------------------------------|--------------------|----------------------|----|----|
|                               |                                                                                                                                                                  |                              |                    | X                    | Y  | Z  |
| Healthy control vs. Late RRMS |                                                                                                                                                                  |                              | 0.01               | 53                   | 33 | 41 |
| Frontal                       | Lt-Lateral Orbito, Medial Orbito, Rostral Middle, Superior Frontal; Lt-Pars Opercularis; Lt-Pars Orbitalis; Lt-Pars Triangularis; Lt-Frontal pole; Lt-Precentral | 168                          |                    |                      |    |    |
| Temporal                      | Lt-Rt-Entorhinal; Lt-Rt-Fusiform; Lt- Middle, Superior, Transverse Temporal; Lt-Rt-Inferior Temporal; Lt-Temporal Pole                                           | 235                          |                    |                      |    |    |
| Parietal                      | Lt-Post Central; Lt-Rt-Precuneus; Lt-Supramarginal                                                                                                               | 123                          |                    |                      |    |    |
| Occipital                     | Lt-Cuneus; Lt-Lingual; Lt-Pericalcarine                                                                                                                          | 44                           |                    |                      |    |    |
| Limbic and Para-limbic        | Lt-Rt-Isthmus Cingulate; Lt-Rostral Anterior Cingulate; Lt-Rt-Parahippocampal; Lt-Rt-Hippocampus; Lt-Insula; Lt-Rt-Amygdala; Lt-Rt-Accumbens                     | 575                          |                    |                      |    |    |
| Deep GM                       | Lt-Rt-Thalamus; Lt-Rt-Caudate; Lt-Putamen                                                                                                                        | 91                           |                    |                      |    |    |

| Early vs. Late RRMS       |                                    | 0.02 | 66 | 56 | 31 |
|---------------------------|------------------------------------|------|----|----|----|
| Frontal                   | Lt-Pars Opercularis; Lt-Precentral |      |    |    | 16 |
| Temporal                  | Lt-Superior, Transverse Temporal   |      |    |    | 40 |
| Parietal                  | Lt-Post Central; Lt-Supramarginal  |      |    |    | 26 |
| Limbic and<br>Para-limbic | Lt-Insula                          |      |    |    | 69 |

Lt, left; Rt, right; GM, gray matter; GBSS, gray-matter–based spatial statistics;  $p$ -FWE, family-wise error-corrected  $p$ -value RRMS, relapsing-remitting multiple sclerosis. Note: Only regions with significantly decreased R2 are included.

**Supplementary Table 3.** ROI analysis of MVF in early and late RRMS patients compared to healthy controls and in late RRMS compared to early RRMS.

|                        | HC           | Early RRMS   | Late RRMS    | FDR                 | Post-Hoc Analyses     |                      |                        |
|------------------------|--------------|--------------|--------------|---------------------|-----------------------|----------------------|------------------------|
|                        | Mean (SD)    | Mean (SD)    | Mean (SD)    | corrected- <i>p</i> | HCs vs. Early<br>RRMS | HCs vs. Late<br>RRMS | Early vs. Late<br>RRMS |
| <b>Frontal</b>         |              |              |              |                     |                       |                      |                        |
| <i>Left</i>            |              |              |              |                     |                       |                      |                        |
| Caudal Middle Frontal  | 9.42 (1.95)  | 8.72 (1.27)  | 8.15 (1.45)  | 0.08                | NS                    | 0.04                 | NS                     |
| Lateral Orbito Frontal | 11.83 (0.88) | 10.91 (0.75) | 10.42 (1.40) | 0.002               | 0.01                  | 0.0003               | NS                     |
| Rostral Middle Frontal | 9.87 (0.74)  | 9.36 (1.19)  | 8.88 (1.36)  | 0.03                | NS                    | 0.007                | NS                     |
| Superior Frontal       | 10.62 (1.49) | 9.85 (1.20)  | 9.37 (1.13)  | 0.02                | NS                    | 0.005                | NS                     |
| Frontal Pole           | 11.80 (1.71) | 10.22 (2.17) | 10.16 (2.25) | 0.04                | NS                    | 0.009                | NS                     |
| Paracentral            | 9.78 (0.97)  | 9.51 (0.85)  | 8.63 (2.11)  | 0.05                | NS                    | 0.03                 | 0.05                   |
| Precentral             | 11.77 (0.83) | 10.75 (0.97) | 10.39 (1.10) | 0.003               | 0.008                 | 0.0004               | NS                     |
| <i>Right</i>           |              |              |              |                     |                       |                      |                        |
| Medial Orbito Frontal  | 11.32 (0.93) | 10.06 (1.31) | 9.69 (1.35)  | 0.001               | 0.03                  | 0.00003              | NS                     |

|                        |              |              |              |       |      |        |      |
|------------------------|--------------|--------------|--------------|-------|------|--------|------|
| Lateral Orbito Frontal | 11.63 (0.95) | 10.44 (1.58) | 10.09 (1.45) | 0.005 | NS   | 0.0006 | NS   |
| Superior Frontal       | 10.77 (1.13) | 9.81 (0.93)  | 9.17 (1.54)  | 0.001 | 0.02 | 0.0002 | 0.02 |
| Precentral             | 11.62 (1.05) | 10.47 (0.81) | 9.95 (1.32)  | 0.001 | 0.01 | 0.0002 | NS   |
| Pars Opercularis       | 10.03 (1.54) | 8.84 (1.81)  | 8.51 (1.75)  | 0.02  | NS   | 0.004  | NS   |
| Pars Orbitalis         | 8.39 (1.48)  | 7.47 (0.85)  | 6.81 (1.51)  | 0.009 | NS   | 0.003  | NS   |
| Pars Triangularis      | 11.56 (1.63) | 11.10 (1.10) | 10.00 (2.00) | 0.01  | NS   | 0.01   | 0.02 |

---

Temporal

*Left*

|                                          |              |              |              |        |      |         |       |
|------------------------------------------|--------------|--------------|--------------|--------|------|---------|-------|
| Banks of the superior<br>temporal sulcus | 14.55 (1.50) | 13.99 (1.49) | 12.95 (2.14) | 0.03   | NS   | 0.01    | NS    |
| Entorhinal                               | 6.15 (0.86)  | 5.99 (0.98)  | 5.25 (1.33)  | 0.006  | NS   | 0.003   | 0.01  |
| Fusiform                                 | 9.02 (1.16)  | 8.13 (1.09)  | 7.61 (1.36)  | 0.007  | 0.04 | 0.001   | NS    |
| Inferior Temporal                        | 8.63 (0.79)  | 7.91 (0.98)  | 7.13 (1.11)  | 0.001  | NS   | 0.00007 | 0.02  |
| Middle Temporal                          | 8.45 (1.14)  | 7.35 (1.11)  | 6.90 (1.16)  | 0.003  | 0.02 | 0.0004  | NS    |
| Superior Temporal                        | 10.73 (0.93) | 9.83 (1.07)  | 9.08 (1.21)  | 0.0008 | 0.02 | 0.00008 | 0.01  |
| Transverse Temporal                      | 16.29 (1.63) | 14.80 (1.92) | 13.44 (1.58) | 0.0005 | 0.04 | 0.00003 | 0.008 |

|                                       |              |              |              |        |      |         |       |
|---------------------------------------|--------------|--------------|--------------|--------|------|---------|-------|
| Temporal Pole                         | 6.57 (1.18)  | 6.06 (1.34)  | 5.41 (1.02)  | 0.006  | NS   | 0.001   | 0.03  |
| <i>Right</i>                          |              |              |              |        |      |         |       |
| Banks of the superior temporal sulcus | 13.19 (1.44) | 12.79 (2.06) | 11.34 (1.61) | 0.006  | NS   | 0.001   | 0.04  |
| Fusiform                              | 10.50 (1.53) | 9.53 (1.59)  | 8.53 (1.92)  | 0.009  | NS   | 0.002   | NS    |
| Inferior Temporal                     | 8.57 (1.22)  | 8.13 (1.16)  | 7.25 (1.14)  | 0.003  | NS   | 0.0006  | 0.009 |
| Superior Temporal                     | 10.80 (1.12) | 9.95 (0.90)  | 9.10 (1.33)  | 0.0008 | 0.04 | 0.00007 | 0.009 |
| Transverse Temporal                   | 15.61 (1.50) | 14.39 (2.20) | 13.30 (2.27) | 0.002  | NS   | 0.0001  | 0.03  |
| Temporal Pole                         | 5.27 (1.02)  | 5.88 (1.37)  | 4.87 (1.04)  | 0.009  | 0.05 | NS      | 0.002 |
| <hr/>                                 |              |              |              |        |      |         |       |
| Parietal                              |              |              |              |        |      |         |       |
| <i>Left</i>                           |              |              |              |        |      |         |       |
| Inferior Parietal                     | 8.00 (0.78)  | 7.43 (0.73)  | 6.95 (1.21)  | 0.01   | NS   | 0.003   | NS    |
| Superior Parietal                     | 9.06 (0.88)  | 8.13 (0.82)  | 7.80 (1.40)  | 0.007  | 0.01 | 0.002   | NS    |
| Postcentral                           | 13.31 (1.33) | 12.01 (1.10) | 11.66 (1.23) | 0.003  | 0.01 | 0.0005  | NS    |
| Precuneus                             | 9.91 (1.19)  | 9.25 (1.29)  | 8.36 (1.80)  | 0.006  | NS   | 0.001   | 0.05  |
| Supramarginal                         | 13.39 (1.51) | 12.41 (1.75) | 11.86 (1.60) | 0.04   | NS   | 0.008   | NS    |

*Right*

|                   |              |              |              |       |       |         |      |
|-------------------|--------------|--------------|--------------|-------|-------|---------|------|
| Inferior Parietal | 8.82 (0.98)  | 7.96 (1.19)  | 7.61 (1.45)  | 0.02  | NS    | 0.005   | NS   |
| Postcentral       | 11.53 (1.08) | 10.88 (0.90) | 10.10 (1.45) | 0.006 | NS    | 0.001   | 0.05 |
| Precuneus         | 10.71 (1.14) | 9.84 (1.45)  | 9.11 (1.73)  | 0.007 | NS    | 0.001   | NS   |
| Supramarginal     | 14.08 (1.10) | 12.03 (1.62) | 11.88 (1.54) | 0.001 | 0.001 | 0.00007 | NS   |

---

*Occipital**Left*

|                   |             |             |             |        |    |        |        |
|-------------------|-------------|-------------|-------------|--------|----|--------|--------|
| Cuneus            | 6.09 (1.18) | 6.05 (1.27) | 4.96 (1.70) | 0.04   | NS | 0.02   | 0.04   |
| Lateral Occipital | 7.12 (1.25) | 6.92 (0.88) | 5.97 (1.14) | 0.004  | NS | 0.004  | 0.003  |
| Lingual           | 9.31 (0.95) | 8.97 (0.74) | 7.90 (1.13) | 0.0007 | NS | 0.0003 | 0.0004 |

*Right*

|                   |              |              |             |       |    |        |        |
|-------------------|--------------|--------------|-------------|-------|----|--------|--------|
| Lateral Occipital | 7.79 (0.77)  | 7.86 (0.67)  | 6.77 (1.03) | 0.001 | NS | 0.002  | 0.0005 |
| Lingual           | 11.08 (0.89) | 10.33 (1.39) | 9.45 (1.52) | 0.003 | NS | 0.0004 | 0.03   |

---

*Limbic and Para-Limbic**Left*

|                   |              |             |             |        |    |         |       |
|-------------------|--------------|-------------|-------------|--------|----|---------|-------|
| Isthmus Cingulate | 10.27 (1.69) | 9.11 (1.25) | 7.29 (2.12) | 0.0009 | NS | 0.00009 | 0.008 |
|-------------------|--------------|-------------|-------------|--------|----|---------|-------|



|                            |              |              |              |        |        |          |       |
|----------------------------|--------------|--------------|--------------|--------|--------|----------|-------|
| Posterior Cingulate        | 11.01 (0.81) | 9.62 (0.93)  | 8.60 (1.43)  | 0.001  | 0.0002 | 0.000004 | 0.01  |
| Rostral Anterior Cingulate | 10.26 (2.27) | 8.76 (1.71)  | 7.85 (1.85)  | 0.009  | NS     | 0.002    | NS    |
| Caudal Anterior Cingulate  | 8.80 (1.75)  | 7.59 (1.14)  | 7.30 (1.96)  | 0.03   | NS     | 0.009    | NS    |
| Parahippocampal            | 10.07 (1.66) | 8.86 (0.90)  | 8.03 (1.63)  | 0.003  | NS     | 0.0004   | 0.03  |
| Hippocampus                | 11.61 (1.38) | 9.70 (1.70)  | 9.05 (2.09)  | 0.003  | 0.007  | 0.0005   | NS    |
| Insula                     | 12.61 (1.31) | 11.65 (1.66) | 10.99 (1.49) | 0.007  | NS     | 0.001    | NS    |
| Amygdala                   | 9.68 (0.95)  | 9.18 (1.12)  | 8.64 (1.88)  | 0.07   | NS     | 0.03     | NS    |
| Accumbens                  | 10.28 (1.39) | 8.71 (1.91)  | 8.72 (1.86)  | 0.02   | 0.02   | 0.005    | NS    |
| <i>Right</i>               |              |              |              |        |        |          |       |
| Isthmus Cingulate          | 10.62 (1.68) | 9.32 (1.45)  | 8.24 (1.78)  | 0.002  | NS     | 0.0003   | 0.03  |
| Posterior Cingulate        | 11.69 (1.27) | 10.28 (1.59) | 9.45 (1.99)  | 0.003  | 0.03   | 0.0003   | NS    |
| Caudal Anterior Cingulate  | 8.87 (1.39)  | 7.77 (1.17)  | 7.24 (1.89)  | 0.009  | NS     | 0.002    | NS    |
| Rostral Anterior Cingulate | 11.35 (1.73) | 9.87 (1.76)  | 8.57 (2.13)  | 0.001  | 0.03   | 0.0002   | 0.03  |
| Parahippocampal            | 11.22 (1.54) | 10.06 (1.29) | 8.58 (1.72)  | 0.0005 | NS     | 0.00004  | 0.004 |
| Hippocampus                | 12.22 (1.48) | 10.30 (1.56) | 9.04 (2.02)  | 0.0005 | 0.01   | 0.00001  | 0.01  |
| Insula                     | 14.01 (1.21) | 12.77 (1.81) | 11.44 (1.71) | 0.0005 | NS     | 0.000008 | 0.02  |

---

|                  |              |              |              |       |       |        |      |
|------------------|--------------|--------------|--------------|-------|-------|--------|------|
| Deep gray matter |              |              |              |       |       |        |      |
| <i>Left</i>      |              |              |              |       |       |        |      |
| Thalamus         | 13.22 (0.80) | 12.31 (1.59) | 11.44 (1.81) | 0.004 | 0.04  | 0.001  | NS   |
| Putamen          | 12.18 (0.88) | 11.58 (1.18) | 11.00 (1.44) | 0.01  | NS    | 0.003  | NS   |
| <i>Right</i>     |              |              |              |       |       |        |      |
| Thalamus         | 13.65 (1.10) | 12.98 (1.30) | 11.77 (1.68) | 0.002 | NS    | 0.0002 | 0.03 |
| Caudate          | 16.50 (3.14) | 13.39 (2.69) | 13.23 (3.49) | 0.01  | 0.009 | 0.007  | NS   |
| Putamen          | 11.88 (1.02) | 11.40 (1.01) | 10.91 (1.22) | 0.03  | NS    | 0.008  | NS   |
| Pallidum         | 15.03 (3.75) | 13.97 (4.60) | 12.00 (3.96) | 0.04  | NS    | 0.009  | NS   |

---

FDR, false discovery rate; HC, healthy control; MVF, myelin volume fraction; NS, not significant; ROI, region of interest; RRMS, relapsing-remitting multiple sclerosis; SD, standard deviation. Note: Only regions with FDR-corrected  $p < 0.05$  are shown.

**Supplementary Table 4.** ROI analysis of R2 in early and late RRMS patients compared to healthy controls and in late RRMS compared to early RRMS patients.

|                        | HCs          | Early RRMS   | Late RRMS    | FDR                 | Post-Hoc Analyses     |                      |                        |
|------------------------|--------------|--------------|--------------|---------------------|-----------------------|----------------------|------------------------|
|                        | Mean (SD)    | Mean (SD)    | Mean (SD)    | corrected- <i>p</i> | HCs vs. Early<br>RRMS | HCs vs. Late<br>RRMS | Early vs. Late<br>RRMS |
| <b>Frontal</b>         |              |              |              |                     |                       |                      |                        |
| <i>Left</i>            |              |              |              |                     |                       |                      |                        |
| Medial Orbito Frontal  | 14.00 (0.94) | 14.00 (0.78) | 13.25 (0.84) | 0.04                | NS                    | 0.01                 | 0.008                  |
| Lateral Orbito Frontal | 13.51 (0.56) | 12.96 (0.59) | 12.71 (0.70) | 0.04                | 0.01                  | 0.0006               | NS                     |
| Rostral Middle Frontal | 13.52 (1.27) | 14.54 (1.35) | 13.02 (1.45) | 0.04                | 0.05                  | NS                   | 0.004                  |
| Paracentral            | 14.24 (1.55) | 14.47 (1.57) | 13.15 (1.07) | 0.04                | NS                    | 0.02                 | 0.001                  |
| Pars Opercularis       | 14.00 (1.99) | 14.61 (1.25) | 12.30 (2.06) | 0.04                | NS                    | 0.02                 | 0.005                  |
| Precentral             | 13.87 (1.59) | 15.37 (2.17) | 13.13 (1.63) | 0.04                | NS                    | NS                   | 0.002                  |
| <i>Right</i>           |              |              |              |                     |                       |                      |                        |
| Medial Orbito Frontal  | 14.16 (1.16) | 14.03 (1.12) | 13.13 (0.65) | 0.04                | NS                    | 0.001                | 0.01                   |
| <b>Temporal</b>        |              |              |              |                     |                       |                      |                        |

*Left*

|                     |              |              |              |      |    |       |       |
|---------------------|--------------|--------------|--------------|------|----|-------|-------|
| Inferior Temporal   | 13.83 (0.94) | 14.02 (1.15) | 13.07 (1.06) | 0.04 | NS | 0.02  | 0.008 |
| Middle Temporal     | 13.80 (1.03) | 14.12 (1.10) | 12.97 (0.89) | 0.04 | NS | 0.005 | 0.004 |
| Superior Temporal   | 14.19 (1.24) | 15.65 (1.82) | 13.99 (1.76) | 0.04 | NS | 0.002 | 0.01  |
| Transverse Temporal | 14.80 (2.71) | 16.08 (2.76) | 13.40 (2.90) | 0.04 | NS | NS    | 0.003 |

Parietal

*Left*

|             |              |              |              |      |    |    |       |
|-------------|--------------|--------------|--------------|------|----|----|-------|
| Postcentral | 14.62 (2.33) | 16.17 (2.99) | 13.80 (1.90) | 0.04 | NS | NS | 0.005 |
|-------------|--------------|--------------|--------------|------|----|----|-------|

Limbic and Para-limbic

*Left*

|                     |              |              |              |      |    |      |       |
|---------------------|--------------|--------------|--------------|------|----|------|-------|
| Posterior Cingulate | 13.54 (1.18) | 14.09 (1.10) | 12.67 (1.04) | 0.04 | NS | NS   | 0.002 |
| Insula              | 14.21 (1.27) | 14.49 (1.58) | 12.93 (1.73) | 0.04 | NS | 0.01 | 0.006 |

*Right*

|           |              |              |              |      |    |    |       |
|-----------|--------------|--------------|--------------|------|----|----|-------|
| Accumbens | 12.85 (1.66) | 13.67 (1.04) | 12.25 (1.36) | 0.04 | NS | NS | 0.001 |
|-----------|--------------|--------------|--------------|------|----|----|-------|

Deep gray matter

*Left*

|         |              |              |              |      |    |        |      |
|---------|--------------|--------------|--------------|------|----|--------|------|
| Putamen | 13.60 (1.02) | 13.21 (1.16) | 12.20 (1.30) | 0.04 | NS | 0.0004 | 0.04 |
|---------|--------------|--------------|--------------|------|----|--------|------|

---

FDR, false discovery rate; HC, healthy control; NS, not significant; ROI, region of interest; RRMS, relapsing-remitting multiple sclerosis; SD, standard deviation. Note: Only regions with FDR-corrected  $p < 0.05$  are shown.

Healthy control vs. Late RRMS

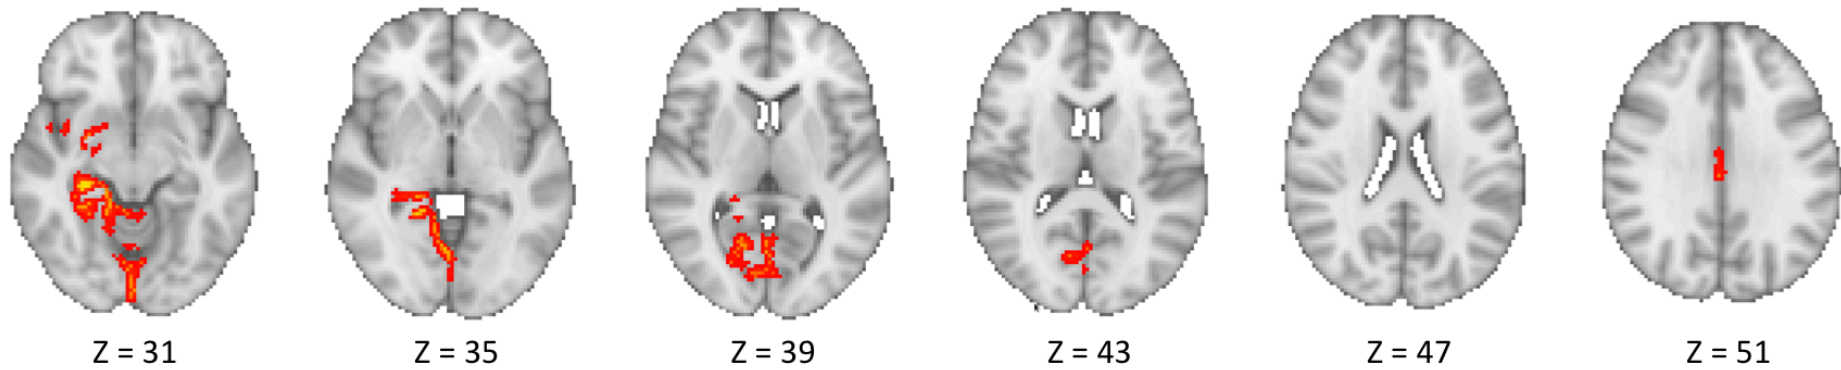

**Supplementary Figure 1.** Comparison of proton density (PD) determined using synthetic quantitative MRI between healthy controls and late relapsing-remitting multiple sclerosis (RRMS) patients. Gray-matter based spatial statistical analysis showed a significantly higher PD (red-yellow voxels) in late RRMS patients when compared with healthy controls. To aid visualization, the results (family-wise error corrected  $p < 0.05$ ) are thickened using the fill script implemented in the FMRIB software library.

Healthy control vs. Late RRMS

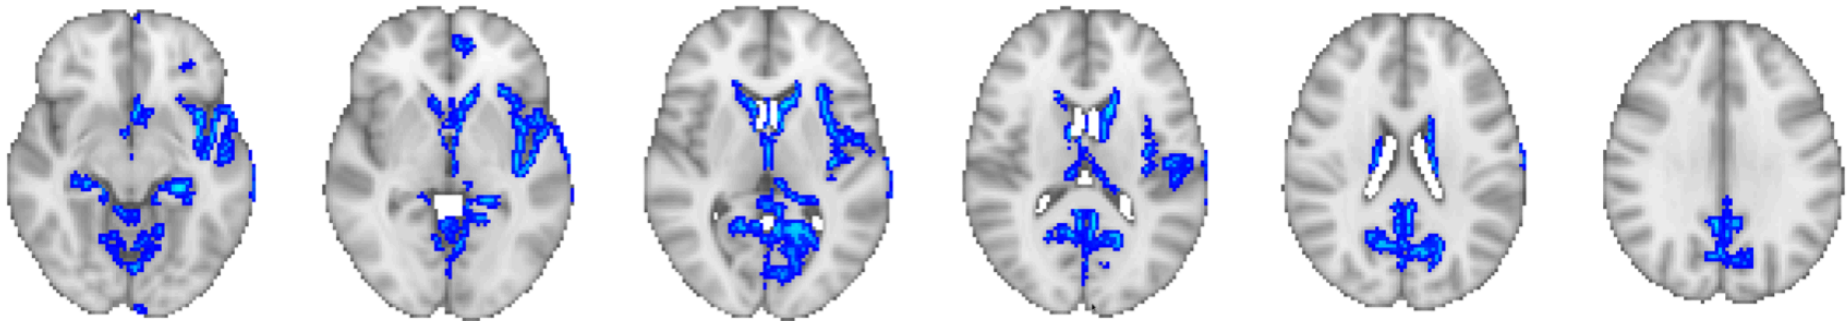

Early vs. Late RRMS

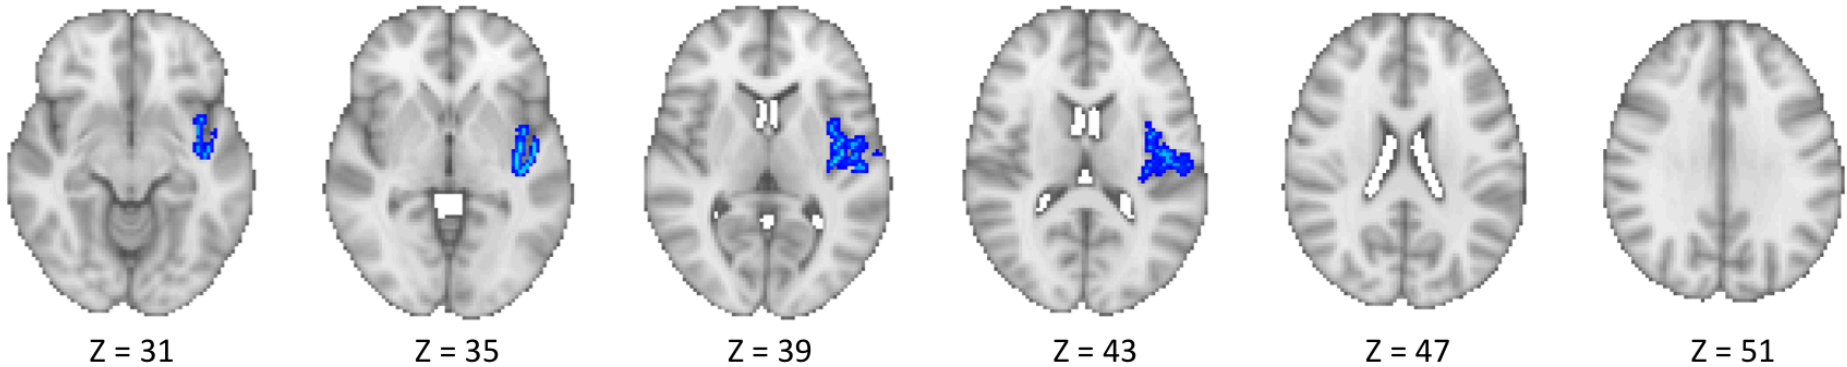

**Supplementary Figure 2.** Comparison of R2 values obtained from synthetic quantitative MRI between healthy controls and early and late relapsing-remitting multiple sclerosis (RRMS) patients. Gray-matter based spatial statistical analysis showed a significantly lower R2 (blue-light blue voxels) in late RRMS patients when compared with healthy controls and early RRMS patients. To aid visualization, the results (family-wise error corrected  $p < 0.05$ ) are thickened using the fill script implemented in the FMRIB software library.
